# Supplementary material for: Kinetic analysis of bioorthogonal reaction mechanisms using Raman microscopy
Source: Royal Society of Chemistry journal article supplement (doi:10.1039/c9fd00057g), 2019-01-01
Supplement: c9fd00057g1.pdf [file c9fd00057g1.pdf]

**Kinetic analysis of bioorthogonal reaction mechanisms using Raman microscopy**

William J. Tipping, Martin Lee, Valerie G. Brunton, Guy C. Lloyd-Jones and Alison N. Hulme

*Supplementary Information*

|                                   |         |
|-----------------------------------|---------|
| Supplementary Figures 1 – 7.....  | S1 – S5 |
| Supplementary Tables S1 – S5..... | S5 – S6 |

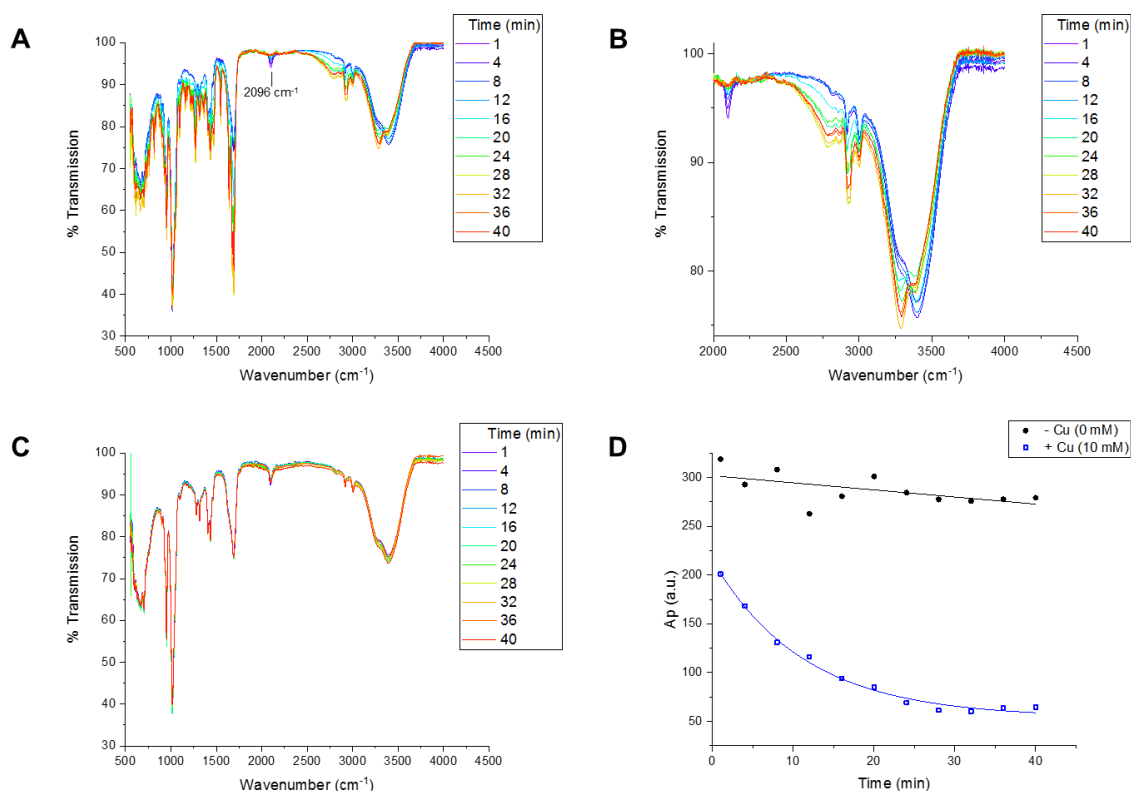

**Figure S1** Reaction monitoring of the CuAAC reaction between EdU (**1**) and biotin-PEG3-azide (**2**) using infrared (IR) spectroscopy. **A** IR spectra of reaction mixture comprising EdU (450 mM), biotin-PEG3-azide (450 mM), CuSO<sub>4</sub> (10 mM) and Na ascorbate (10 mM) in DMSO/TBS 3:2 v/v. An aliquot of the reaction mixture was removed at each timepoint and the individual IR spectra presented between 0-40 min. The IR spectra were normalised to the baseline at 2220 cm<sup>-1</sup>. Peak annotation: 2096 cm<sup>-1</sup> (N<sub>3</sub>, azide) **B** Expanded view of the spectra provided in **A** scaled between 2000-4500 cm<sup>-1</sup>. **C** Control CuAAC reaction where [Cu] = 0 mM (using the same concentrations for the other reagents as in **A**, and consistent acquisition & normalisation procedures). **D** Integration analysis of the normalised IR peak at 2096 cm<sup>-1</sup> (N<sub>3</sub>, biotin-PEG3-azide) for the reaction presented in **A** (blue squares, +Cu (10 mM) with exponential fitting applied) and a control reaction (black circles, -Cu, linear fitting) where [Cu] = 0 mM. A<sub>p</sub> = peak area @ 2096 cm<sup>-1</sup>.

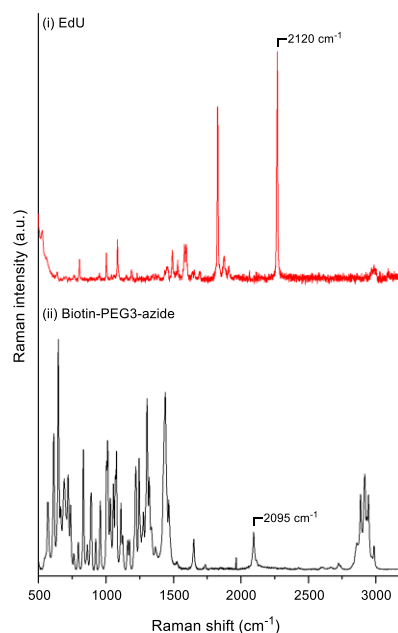

**Figure S2** Raman spectroscopy of alkyne- and azide-labelled biomolecular reagents. Raman spectrum of (i) EdU (**1**) and (ii) biotin-PEG3- azide (**2**) acquired using  $\lambda_{\text{ex}} = 532$  nm for 10 s, using a 20 $\times$  objective lens and 1% laser power for (i) and 10% laser power for (ii). Raman spectra are scaled between (i) 0 – 38,000 and (ii) 0 – 60,000 counts and offset for clarity. The following peaks have been annotated: 2120  $\text{cm}^{-1}$  (EdU;  $\text{C}\equiv\text{C}$ ); 2095  $\text{cm}^{-1}$  (biotin-PEG3-azide;  $\text{N}=\text{N}=\text{N}$  asymmetric stretch).

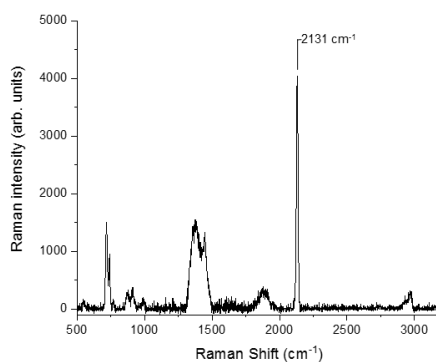

**Figure S3** Raman spectrum of propargyl choline (bromide salt). Peak annotation 2131  $\text{cm}^{-1}$  (propargyl choline bromide;  $\text{C}\equiv\text{C}$ ). Raman spectrum was acquired using  $\lambda_{\text{ex}} = 785$  nm, 30 s integration time and a 50 $\times$  objective lens.

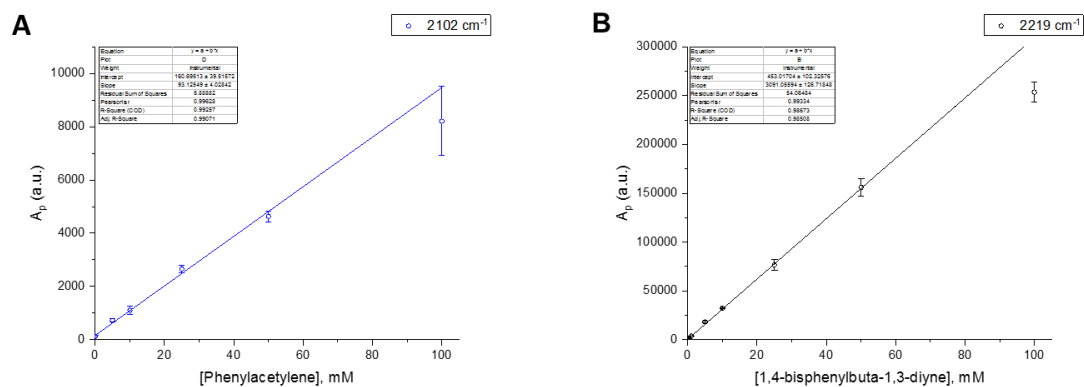

**Figure S4** Calibration curves of phenylacetylene (PA) and 1,4-bisphenylbuta-1,3-diyne (**5**) by spontaneous Raman spectroscopy. Calibration curve of **A** phenylacetylene in DMSO (0 – 100 mM) and **B** 1,4-bisphenylbuta-1,3-diyne analysed by Raman spectroscopy. The spectra were normalised to the intensity peak at 1418  $\text{cm}^{-1}$  (DMSO CH def.) and the area of the peak at 2102  $\text{cm}^{-1}$  or 2219  $\text{cm}^{-1}$  was determined in each case. The data points represent the mean of 6 replicate spectra, with error bars  $\pm$  S.D. A linear fitting is applied to each data set. Raman spectra were acquired using  $\lambda_{\text{ex}} = 532$  nm, 20 s integration time, 20x objective lens.  $A_p$  = peak area @ 2102  $\text{cm}^{-1}$  / 2219  $\text{cm}^{-1}$ .

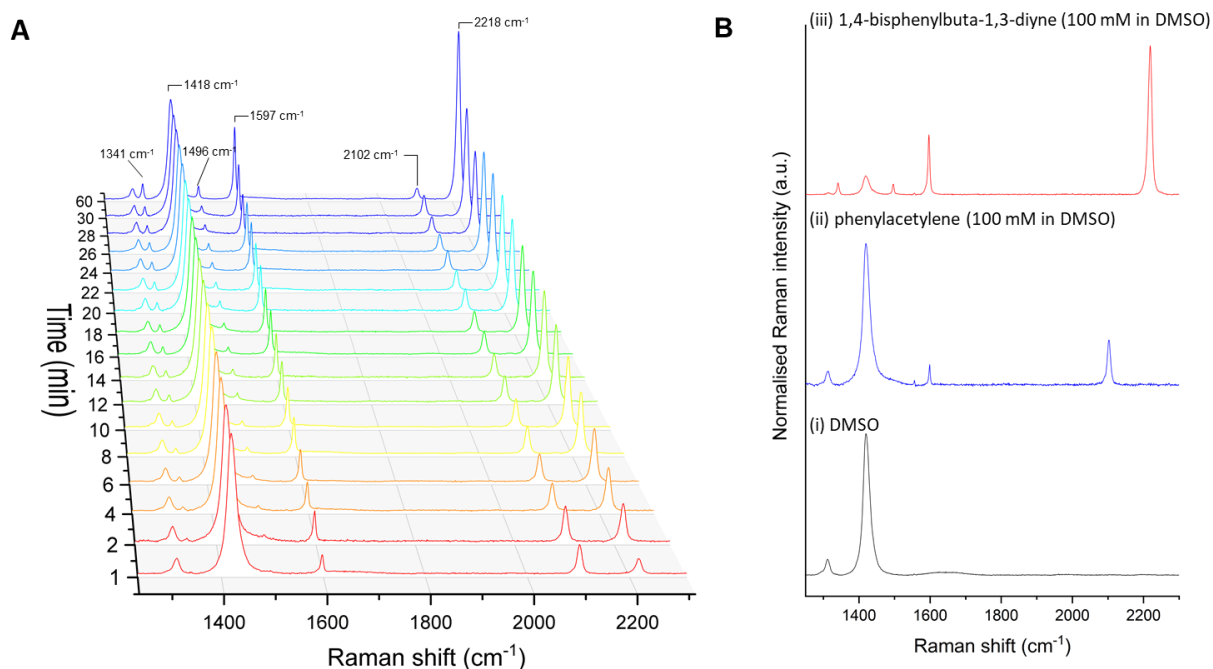

**Figure S5** Reaction monitoring of the Glaser-Hay homocoupling of phenylacetylene using Raman spectroscopy. **A** Glaser-Hay reaction of phenylacetylene (100 mM) using CuI (10 mM, 10 mol%) and TMEDA (10 mM, 10 mol%) in DMSO. Raman spectra of the reaction mixture acquired at the indicated timepoints following addition of the CuI/TMEDA catalyst. An aliquot of the reaction mixture were removed at each timepoint and the individual Raman spectra presented between 0-60 min. Spectra were acquired using  $\lambda_{\text{ex}} = 532$  nm for 20 s using a 20x objective lens. The Raman spectra were normalised to the intensity of the peak at 1418  $\text{cm}^{-1}$  (DMSO CH def.). **B** Raman spectroscopy of (i) DMSO, (ii) phenylacetylene (PA) (100 mM in DMSO) and (iii) 1,4-bisphenylbuta-1,3-diyne (**5**) (100 mM in DMSO). Spectra were acquired using  $\lambda_{\text{ex}} = 532$  nm for 20 s using a 20x objective lens. The Raman spectra were normalised to the intensity of the peak at 1418  $\text{cm}^{-1}$  (DMSO CH def.) and offset for clarity.

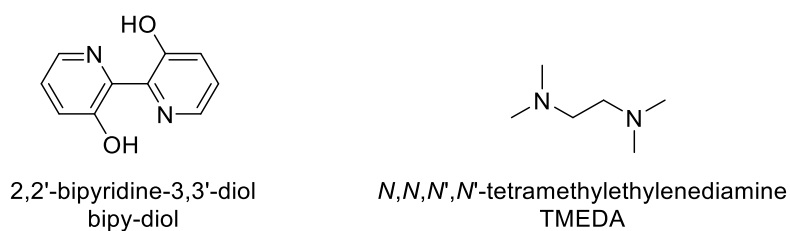

**Figure S6** Chemical structures of the copper co-ordinating ligands used in this study.

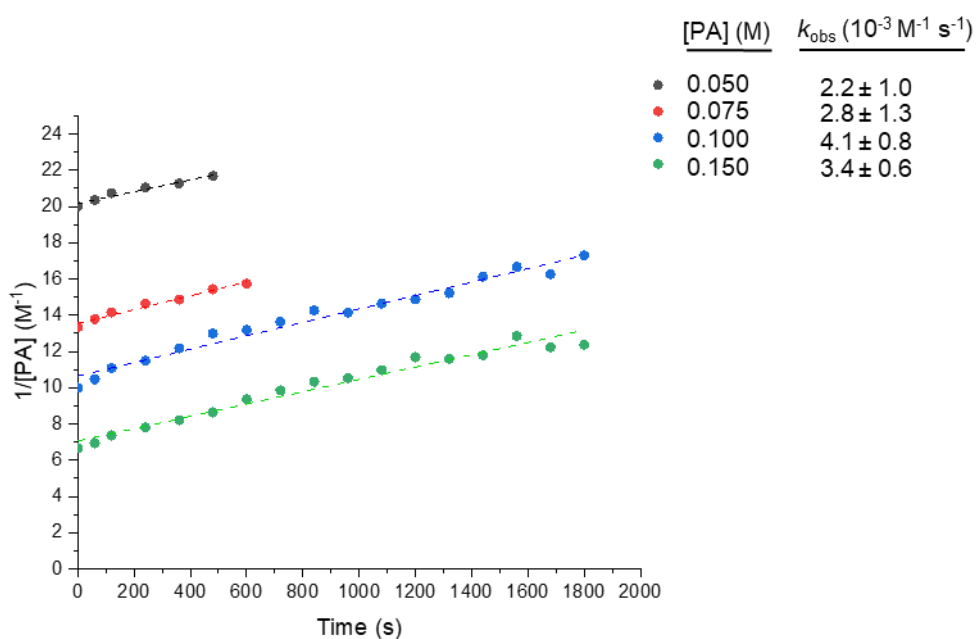

**Figure S7** Second-order plot of initial phenylacetylene concentration in the Glaser-Hay reaction. Phenylacetylene (PA, 50-150 mM) was reacted with CuI (10 mM) and TMEDA (10 mM) by Raman spectroscopy using  $\lambda_{\text{ex}} = 532 \text{ nm}$  for 20 s using a 20 $\times$  objective lens. A linear fitting was applied to each dataset and rate constants are provided for each [PA] with  $k_{\text{obs}} \pm 0.5 \text{ RMSE}$ .

**Table S1** Kinetics of the CuAAC reaction of EdU and biotin-PEG3-azide with respect to varying  $[\text{Cu}]_{\text{tot}}$ . Tabulated data accompanying **Figure 5A**.

| [EdU]<br>( $10^{-3} \text{ M}$ ) | [azide]<br>( $10^{-3} \text{ M}$ ) | [NaAsc]<br>( $10^{-3} \text{ M}$ ) | [Cu] <sub>tot</sub><br>( $10^{-3} \text{ M}$ ) | [THPTA]<br>( $10^{-3} \text{ M}$ ) | $k_{\text{obs}}$<br>( $10^{-3} \text{ s}^{-1}$ ) |
|----------------------------------|------------------------------------|------------------------------------|------------------------------------------------|------------------------------------|--------------------------------------------------|
| 100                              | 100                                | 100                                | 0                                              | 0                                  | $\leq 0.2$                                       |
| 100                              | 100                                | 100                                | 1                                              | 1                                  | $0.1 \pm 0.2$                                    |
| 100                              | 100                                | 100                                | 2                                              | 2                                  | $0.4 \pm 0.3$                                    |
| 100                              | 100                                | 100                                | 5                                              | 5                                  | $3.4 \pm 0.4$                                    |
| 100                              | 100                                | 100                                | 10                                             | 10                                 | $8.8 \pm 1.2$                                    |
| 100                              | 100                                | 100                                | 15                                             | 15                                 | $13 \pm 3$                                       |

**Table S2** Kinetics of the CuAAC reaction of EdU and biotin-PEG3-azide with respect to varying [THPTA]/[Cu]<sub>tot</sub>. Tabulated data accompanying **Figure 5B**.

| [EdU]<br>(10 <sup>-3</sup> M) | [azide]<br>(10 <sup>-3</sup> M) | [NaAsc]<br>(10 <sup>-3</sup> M) | [Cu] <sub>tot</sub><br>(10 <sup>-3</sup> M) | [THPTA]<br>(10 <sup>-3</sup> M) | [L]/[Cu] <sub>tot</sub> | <i>k</i> <sub>obs</sub><br>(10 <sup>-3</sup> s <sup>-1</sup> ) |
|-------------------------------|---------------------------------|---------------------------------|---------------------------------------------|---------------------------------|-------------------------|----------------------------------------------------------------|
| 100                           | 100                             | 100                             | 5                                           | 0                               | 0                       | 0.3 ± 0.2                                                      |
| 100                           | 100                             | 100                             | 5                                           | 2.5                             | 0.5                     | 2.9 ± 0.8                                                      |
| 100                           | 100                             | 100                             | 5                                           | 5                               | 1                       | 3.4 ± 0.4                                                      |
| 100                           | 100                             | 100                             | 5                                           | 7.5                             | 1.5                     | 3.1 ± 0.7                                                      |
| 100                           | 100                             | 100                             | 5                                           | 10                              | 2                       | 3.6 ± 0.8                                                      |
| 100                           | 100                             | 100                             | 5                                           | 15                              | 3                       | 2.6 ± 0.8                                                      |

**Table S3** Experimental conditions for the Glaser-Hay homocoupling of phenyl acetylene.

| Entry | [PA]<br>(mM) | [Cu] <sub>tot</sub><br>(mM) | [Ligand]<br>(mM)    |
|-------|--------------|-----------------------------|---------------------|
| 1     | 100          | 0-20 <sup>[a]</sup>         | 0-20                |
| 2     | 100          | 10                          | 0-15 <sup>[b]</sup> |
| 3     | 100          | 10 <sup>[c]</sup>           | 10                  |
| 4     | 100          | 10                          | 10 <sup>[d]</sup>   |

<sup>[a]</sup> [Cu] = [TMEDA] for all combinations. <sup>[b]</sup> [TMEDA] varied with fixed [Cu] concentration. <sup>[c]</sup> Cu source varied between CuI and Cu(OAc)<sub>2</sub>. <sup>[d]</sup> Ligand varied between none, TMEDA and bipy-diol.

**Table S4** Kinetics of the Glaser-Hay homocoupling of phenyl acetylene with respect to varying [Cu]<sub>tot</sub>. Tabulated data accompanying **Figure 7A**.

| [PA]<br>(10 <sup>-3</sup> M) | [Cu] <sub>tot</sub><br>(10 <sup>-3</sup> M) | [TMEDA]<br>(10 <sup>-3</sup> M) | [Cu] <sub>tot</sub> <sup>2</sup><br>(10 <sup>-6</sup> M <sup>2</sup> ) | <i>k</i> <sub>obs</sub><br>(10 <sup>-3</sup> M <sup>-1</sup> s <sup>-1</sup> ) |
|------------------------------|---------------------------------------------|---------------------------------|------------------------------------------------------------------------|--------------------------------------------------------------------------------|
| 100                          | 0                                           | 0                               | 0.0                                                                    | ≤0.2                                                                           |
| 100                          | 2.5                                         | 2.5                             | 6.2                                                                    | 0.5 ± 0.2                                                                      |
| 100                          | 5.0                                         | 5.0                             | 25                                                                     | 1.1 ± 0.5                                                                      |
| 100                          | 7.5                                         | 7.5                             | 56                                                                     | 2.5 ± 0.3                                                                      |
| 100                          | 10.0                                        | 10.0                            | 100                                                                    | 4.1 ± 0.8                                                                      |
| 100                          | 15.0                                        | 15.0                            | 225                                                                    | 11.2 ± 1.9                                                                     |
| 100                          | 20.0                                        | 20.0                            | 400                                                                    | 17.7 ± 2.2                                                                     |

**Table S5** Kinetics of the Glaser-Hay homocoupling of phenyl acetylene with respect to varying [TMEDA]/[Cu]<sub>tot</sub>. Tabulated data accompanying **Figure 7B**.

| [PA]<br>(10 <sup>-3</sup> M) | [Cu] <sub>tot</sub><br>(10 <sup>-3</sup> M) | [TMEDA]<br>(10 <sup>-3</sup> M) | [TMEDA]/[Cu] <sub>tot</sub> | <i>k</i> <sub>obs</sub><br>(10 <sup>-3</sup> M <sup>-1</sup> s <sup>-1</sup> ) |
|------------------------------|---------------------------------------------|---------------------------------|-----------------------------|--------------------------------------------------------------------------------|
| 100                          | 10                                          | 0                               | 0                           | 0.07 ± 0.06                                                                    |
| 100                          | 10                                          | 5                               | 0.5                         | 1.2 ± 0.4                                                                      |
| 100                          | 10                                          | 10                              | 1                           | 4.1 ± 0.8                                                                      |
| 100                          | 10                                          | 15                              | 1.5                         | 0.20 ± 0.07                                                                    |
